# Supplementary material for: Addressing Missing Data in GC × GC Metabolomics: Identifying Missingness Type and Evaluating the Impact of Imputation Methods on Experimental Replication
Source: PubMed Central journal article supplement — Anal Chem. 2022 Jul 26;94(31):10912–20. doi: 10.1021/acs.analchem.1c04093 (PMC9369014; doi:10.1021/acs.analchem.1c04093), 2022-07-26
Supplement: ac1c04093_si_001.pdf [file ac1c04093_si_001.pdf]

## SUPPLEMENTARY INFORMATION

### Addressing Missing Data in GC×GC Metabolomics: Identifying Missingness Type and Evaluating the Impact of Imputation Methods on Experimental Replication

Trenton J. Davis<sup>a,b,†</sup>, Tarek R. Firzli<sup>c,†</sup>, Emily A. Higgins Keppler<sup>a,b,†</sup>, Matthew Richardson<sup>d,e\*</sup>, and Heather D. Bean<sup>a,b\*</sup>

<sup>a</sup> *School of Life Sciences, Arizona State University, Tempe, AZ, 85287 United States*

<sup>b</sup> *Center for Fundamental and Applied Microbiomics, The Biodesign Institute, Tempe, AZ, 85287 United States*

<sup>c</sup> *School of Medicine, University of Nevada, Reno, NV, 89557 United States*

<sup>d</sup> *Department of Respiratory Sciences, College of Life Sciences, University of Leicester, Leicester, LE1 7RH, United Kingdom*

<sup>e</sup> *NIHR Biomedical Research Centre (Respiratory Theme), Institute for Lung Health, Leicester, LE1 7RH, United Kingdom*

\*Email: mr251@leicester.ac.uk, Heather.D.Bean@asu.edu

† T.J.D., T.R.F., and E.A.H.K. contributed equally to this paper.

## Table of Contents

|                                         |    |
|-----------------------------------------|----|
| Definitions of imputation methods ..... | S3 |
| Supplementary Figure 1 .....            | S4 |
| Supplementary Table 1.....              | S5 |
| Supplementary Figure 2 .....            | S6 |
| Supplementary Table 2.....              | S7 |
| Supplementary Table 3.....              | S8 |

## Definitions of imputation methods

Zero: Impute all missing values to 0.

Minimum: Impute all missing values to the minimum value. This can be a global minimum (of all present data) or a local minimum of the feature in question. The local minimum was used in this study.

Half-minimum (HM): Impute all missing values to half of the global or local minimum value. The local half-minimum was used in this study.

Mean: Impute all missing values to the global or local mean value. The local mean was used in this study.

Median: Impute all missing values to the global or local median value. The local median was used in this study.

Bayesian principal component analysis (BPCA): This method utilizes Bayesian and expectation maximization methods to determine principal components. These are then used to impute missing values.

Random Forest (RF): RF imputation iteratively fits ensembles of uncorrelated decision trees—random forests—to observed data and uses these models to predict missing values.

Quantile regression imputation of left-censored data (QRILC): This imputation method was specifically designed to deal with missingness of the MNAR type where data is missing due to the limits-of-detection, also called left-censored missingness. This method draws data from the lower quantile of a distribution that is estimated based on quantile regression.

Gibbs Sampler Imputation (GSImp): GSImp is a method developed for left-censored data which begins by initially imputing data using QRILC. Elastic net regression models are then utilized to build a distribution from which updated imputation values will be drawn. This process is iteratively repeated.

Replicate Zero (RepZero): First, permute to zero any replicate group that has > 50% missing values (change the entire group of replicates to 0 for that feature). Imputation is performed on the remaining missing values using zero imputation.

Replicate Minimum (RepMin): First, permute to zero any replicate group that has >50% missing values (change the entire group of replicates to 0 for that feature). Imputation is performed on the remaining missing values using the minimum value within the replicate samples.

Replicate Half-Minimum (RepHM): First, permute to zero any replicate group that has >50% missing values (change the entire group of replicates to 0 for that feature). Imputation is performed on the remaining missing values using the half-minimum value within the replicate samples.

Replicate Mean (RepMean): First, permute to zero any replicate group that has >50% missing values (change the entire group of replicates to 0 for that feature). Imputation is performed on the remaining missing values using the mean value within the replicate samples.

Replicate Median (RepMedian): First, permute to zero any replicate group that has >50% missing values (change the entire group of replicates to 0 for that feature). Imputation is performed on the remaining missing values using the median value within the replicate samples.

Replicate BPCA (RepBPCA): First, permute to zero any replicate group that has >50% missing values (change the entire group of replicates to 0 for that feature). Imputation is performed on the remaining missing values across the entire data set using BPCA and the present values across the entire data set.

Replicate RF (RepRF): First, permute to zero any replicate group that has >50% missing values (change the entire group of replicates to 0 for that feature). Imputation is performed on the remaining missing values across the entire data set using RF and the present values across the entire data set.

Replicate QRILC (RepQRILC): First, permute to zero any replicate group that has >50% missing values (change the entire group of replicates to 0 for that feature). Imputation is performed on the remaining missing values across the entire data set using QRILC and the present values across the entire data set.

Replicate GSImp (RepGSImp): First, permute to zero any replicate group that has >50% missing values (change the entire group of replicates to 0 for that feature). Imputation is performed on the remaining missing values across the entire data set using GSImp and the present values across the entire data set.

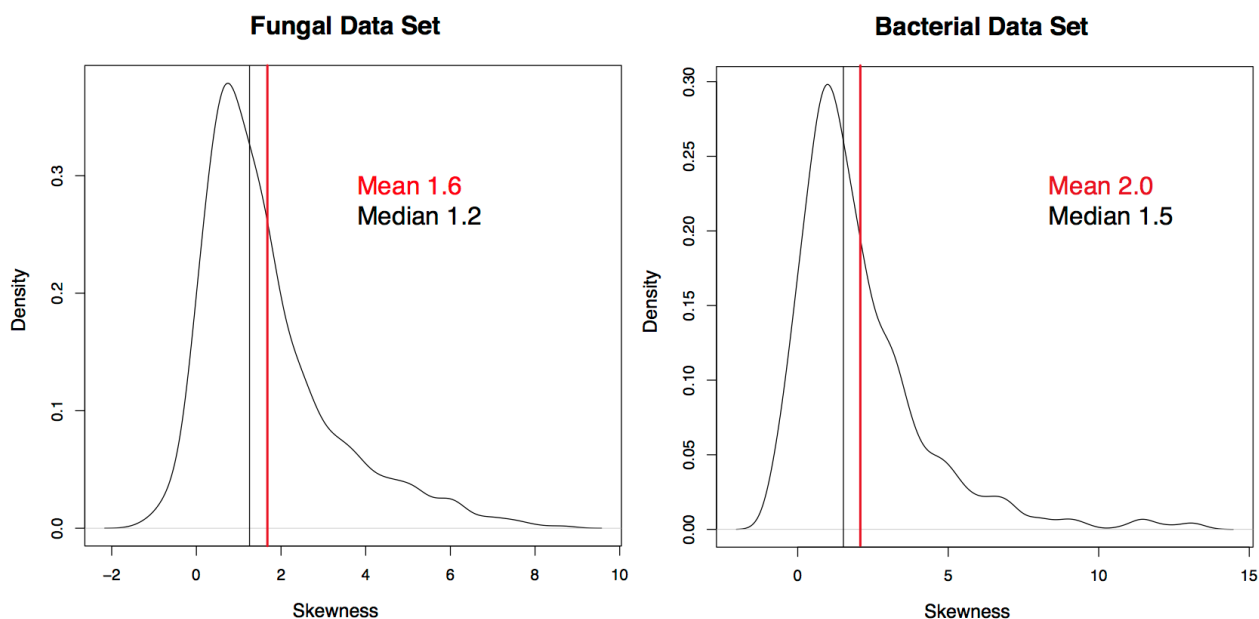

**Supplementary Figure 1.** Density plots of the full fungal and bacterial data sets.

**Supplementary Table 1. ICC shifts following imputation.**

**Fungal Data Set**

|                       | RephM | HM | RepMin | Min | RepMean | Mean | RepMedian | Median | RepBPCA | BPCA | RepQRILC | QRILC | RepRF | RF | RepGSImp | GSImp |
|-----------------------|-------|----|--------|-----|---------|------|-----------|--------|---------|------|----------|-------|-------|----|----------|-------|
| Excellent to Good     | 1     | 5  | 0      | 8   | 0       | 4    | 0         | 4      | 0       | 1    | 0        | 2     | 1     | 2  | 3        | 7     |
| Excellent to Moderate | 0     | 0  | 0      | 0   | 0       | 0    | 0         | 0      | 0       | 1    | 0        | 2     | 0     | 0  | 0        | 1     |
| Excellent to Poor     | 0     | 0  | 0      | 0   | 0       | 5    | 0         | 5      | 0       | 5    | 0        | 0     | 0     | 5  | 0        | 0     |
| Good to Excellent     | 13    | 4  | 14     | 5   | 14      | 0    | 14        | 0      | 12      | 0    | 9        | 0     | 13    | 0  | 8        | 4     |
| Good to Moderate      | 0     | 11 | 0      | 12  | 0       | 13   | 0         | 15     | 0       | 1    | 0        | 3     | 0     | 5  | 11       | 0     |
| Good to Poor          | 0     | 1  | 0      | 1   | 0       | 12   | 0         | 9      | 0       | 12   | 0        | 1     | 0     | 9  | 0        | 1     |
| Moderate to Excellent | 43    | 3  | 43     | 4   | 43      | 0    | 43        | 0      | 32      | 1    | 7        | 0     | 42    | 2  | 8        | 4     |
| Moderate to Good      | 5     | 10 | 2      | 9   | 2       | 2    | 2         | 4      | 10      | 3    | 21       | 0     | 4     | 3  | 20       | 17    |
| Moderate to Poor      | 2     | 18 | 0      | 21  | 0       | 53   | 0         | 44     | 2       | 41   | 1        | 5     | 2     | 33 | 13       | 9     |
| Poor to Excellent     | 346   | 0  | 358    | 1   | 362     | 0    | 362       | 2      | 236     | 0    | 3        | 0     | 354   | 0  | 3        | 1     |
| Poor to Good          | 39    | 5  | 27     | 7   | 22      | 2    | 22        | 3      | 105     | 3    | 14       | 0     | 28    | 5  | 15       | 11    |
| Poor to Moderate      | 26    | 27 | 25     | 28  | 25      | 13   | 25        | 15     | 54      | 29   | 133      | 1     | 22    | 33 | 145      | 45    |

**Bacterial Data Set**

|                       | RephM | HM | RepMin | Min | RepMean | Mean | RepMedian | Median | RepBPCA | BPCA | RepQRILC | QRILC | RepRF | RF  | RepGSImp | GSImp |
|-----------------------|-------|----|--------|-----|---------|------|-----------|--------|---------|------|----------|-------|-------|-----|----------|-------|
| Excellent to Good     | 0     | 0  | 0      | 2   | 0       | 0    | 0         | 1      | 0       | 0    | 0        | 0     | 0     | 0   | 0        | 6     |
| Excellent to Moderate | 0     | 0  | 0      | 0   | 0       | 3    | 0         | 2      | 0       | 1    | 0        | 0     | 0     | 3   | 0        | 1     |
| Excellent to Poor     | 0     | 0  | 0      | 0   | 0       | 3    | 0         | 3      | 0       | 8    | 0        | 8     | 0     | 6   | 0        | 0     |
| Good to Excellent     | 30    | 8  | 30     | 8   | 30      | 2    | 30        | 2      | 25      | 0    | 7        | 1     | 30    | 1   | 9        | 5     |
| Good to Moderate      | 0     | 4  | 0      | 3   | 0       | 12   | 0         | 12     | 0       | 14   | 0        | 5     | 0     | 15  | 1        | 5     |
| Good to Poor          | 0     | 0  | 0      | 2   | 0       | 18   | 0         | 17     | 0       | 14   | 0        | 9     | 0     | 7   | 0        | 0     |
| Moderate to Excellent | 95    | 0  | 95     | 1   | 95      | 0    | 95        | 0      | 74      | 0    | 4        | 0     | 95    | 0   | 4        | 1     |
| Moderate to Good      | 21    | 63 | 20     | 63  | 20      | 19   | 20        | 25     | 30      | 19   | 55       | 4     | 20    | 37  | 83       | 57    |
| Moderate to Poor      | 0     | 12 | 0      | 15  | 0       | 75   | 0         | 66     | 0       | 60   | 0        | 24    | 0     | 43  | 8        | 8     |
| Poor to Excellent     | 464   | 0  | 471    | 1   | 473     | 0    | 473       | 1      | 375     | 0    | 2        | 0     | 466   | 0   | 2        | 0     |
| Poor to Good          | 48    | 14 | 43     | 16  | 41      | 13   | 41        | 18     | 125     | 29   | 19       | 0     | 48    | 104 | 29       | 16    |
| Poor to Moderate      | 39    | 72 | 37     | 77  | 36      | 49   | 36        | 60     | 42      | 188  | 254      | 18    | 34    | 230 | 278      | 123   |

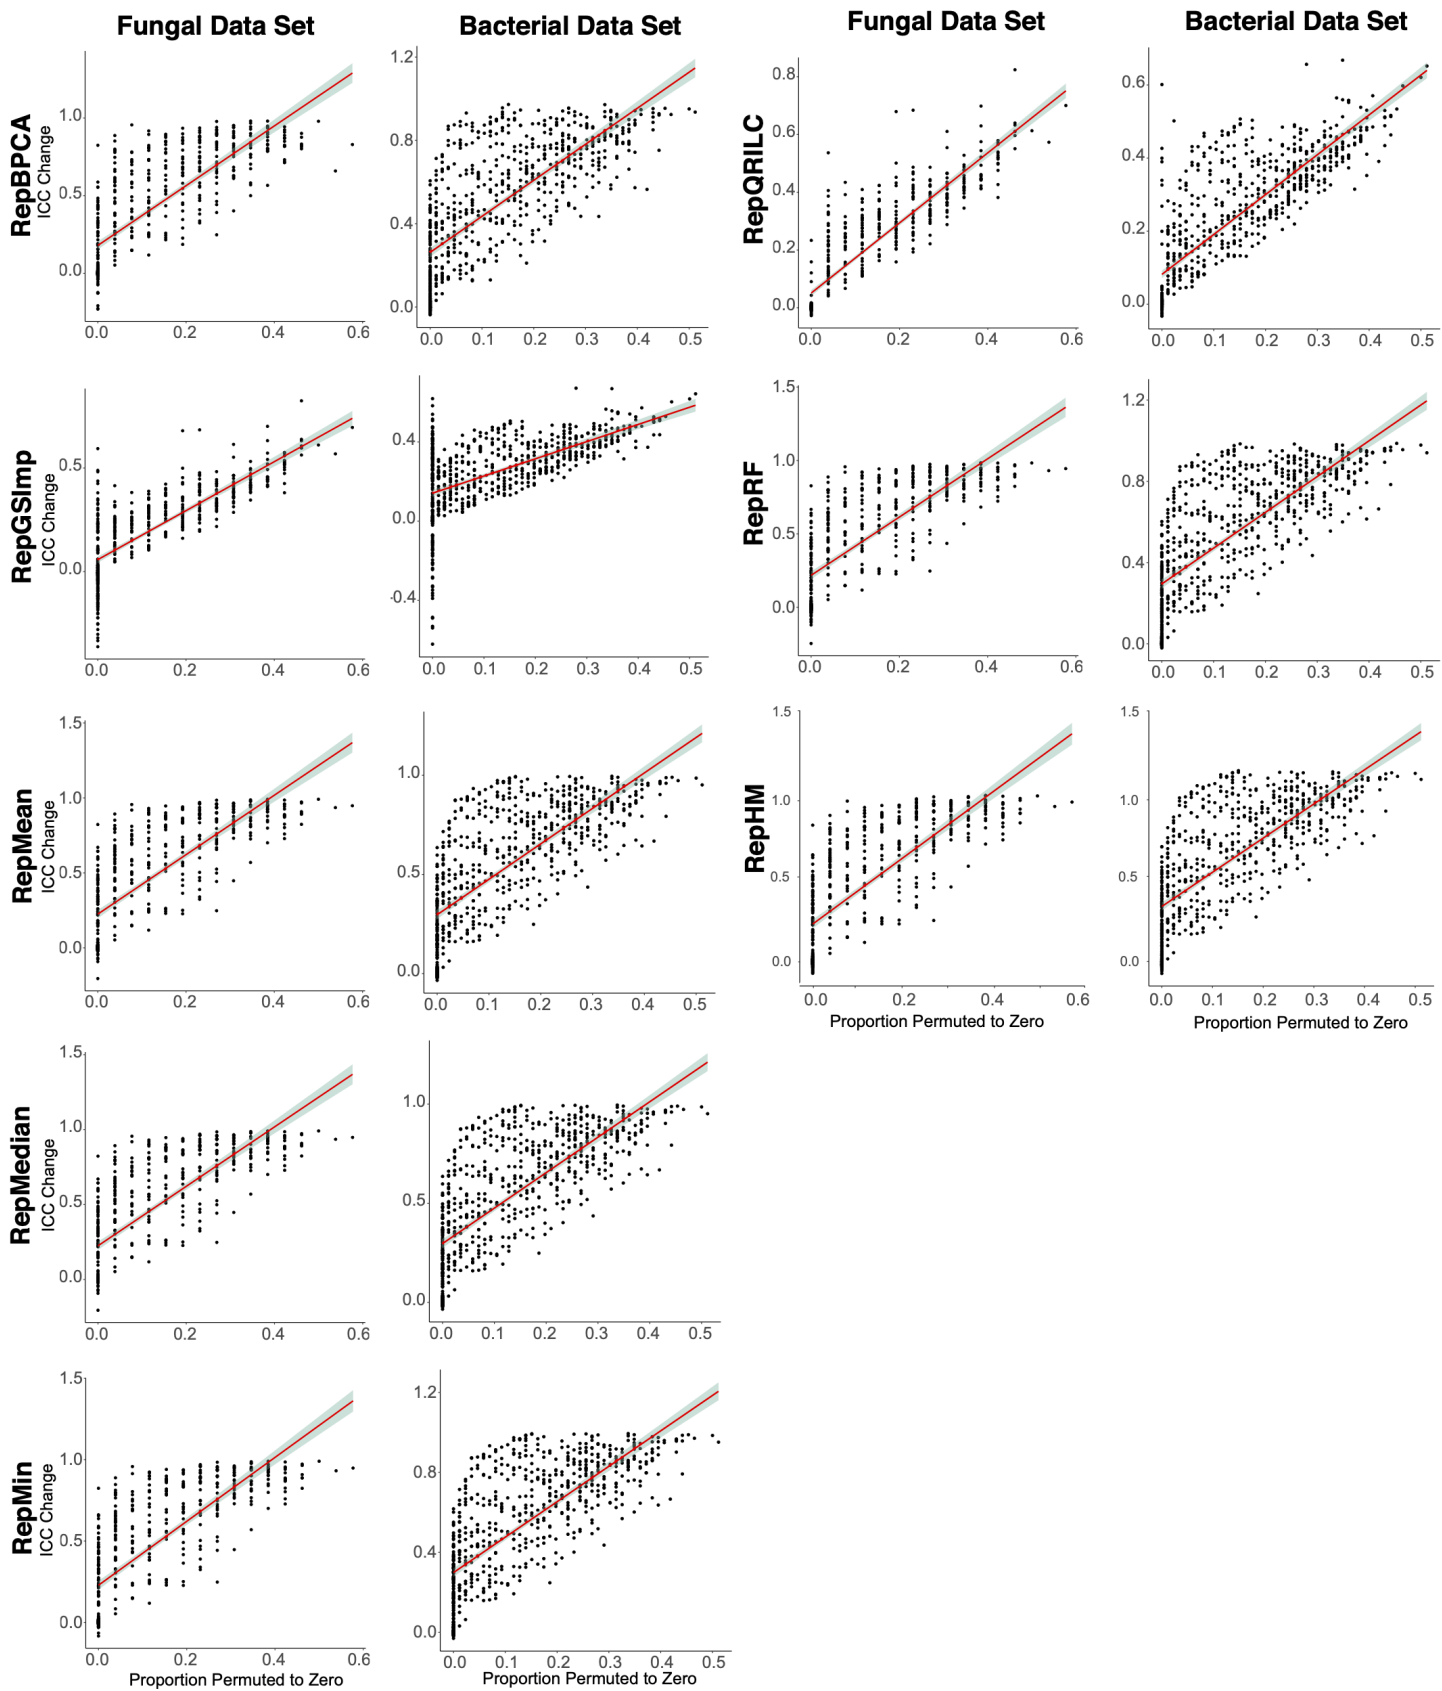

**Supplementary Figure 2.** Relationship between the change of volatile ICCs relative to RepZero imputation and the proportion of features permuted to zero within a group of replicates. The line represents the linear regression fit and its standard error (shaded region).

**Supplementary Table 2.** Point and interval estimates of linear regressions of the relationship between the change of volatile ICCs and the proportion of features permuted to zero within a group of replicates using within-replicate imputation.

| <b>Fungal Data Set</b> |          |             |               | <b>Bacterial Data Set</b> |          |             |               |
|------------------------|----------|-------------|---------------|---------------------------|----------|-------------|---------------|
|                        | <i>r</i> | 95% CI      | <i>P</i>      |                           | <i>r</i> | 95% CI      | <i>P</i>      |
| Rep HM                 | 0.78     | (0.75-0.85) | <i>P</i> = 0+ | Rep HM                    | 0.75     | (0.72-0.78) | <i>P</i> = 0+ |
| Rep Min                | 0.78     | (0.74-0.81) | <i>P</i> = 0+ | Rep Min                   | 0.75     | (0.72-0.78) | <i>P</i> = 0+ |
| Rep Mean               | 0.78     | (0.74-0.81) | <i>P</i> = 0+ | Rep Mean                  | 0.75     | (0.72-0.78) | <i>P</i> = 0+ |
| Rep Median             | 0.78     | (0.74-0.81) | <i>P</i> = 0+ | Rep Median                | 0.75     | (0.72-0.78) | <i>P</i> = 0+ |
| Rep BPCA               | 0.78     | (0.75-0.82) | <i>P</i> = 0+ | Rep BPCA                  | 0.75     | (0.71-0.78) | <i>P</i> = 0+ |
| Rep QRILC              | 0.89     | (0.88-0.91) | <i>P</i> = 0+ | Rep QRILC                 | 0.83     | (0.80-0.85) | <i>P</i> = 0+ |
| Rep RF                 | 0.78     | (0.74-0.81) | <i>P</i> = 0+ | Rep RF                    | 0.76     | (0.73-0.79) | <i>P</i> = 0+ |
| Rep Gsimp              | 0.81     | (0.78-0.84) | <i>P</i> = 0+ | Rep Gsimp                 | 0.62     | (0.57-0.66) | <i>P</i> = 0+ |

**Supplementary Table 3.** List of R packages loaded in MetabImpute.

|            |              |
|------------|--------------|
| abind      | Matrix       |
| doParallel | matrixStats  |
| e1071      | missForest   |
| FNN        | missRanger   |
| foreach    | nonpar       |
| gamlss     | pcaMethods   |
| ggplot2    | PEMM         |
| glmnet     | randomForest |
| gridExtra  | reshape2     |
| ICC        | Rmisc        |
| impute     | rpart        |
| imputeLCMD | stats        |
| ltm        | tidyr        |
| magrittr   | vegan        |
| MASS       |              |
